# Supplementary material for: Understanding the Challenges of HPV-Based Cervical Screening: Development and Validation of HPV Testing and Self-Sampling Attitudes and Beliefs Scales
Source: MDPI journal article supplement (doi:10.3390/curroncol30010093), 2023-01-15

## **Supplementary Material File S5.**

Item Information Functions and Test Characteristic Curves

## HPV test Attitudes and Belief Scale

Figure SA. Item information functions (IIFs) and test characteristic curve (TCC) for **Personal barriers** (N=1027)

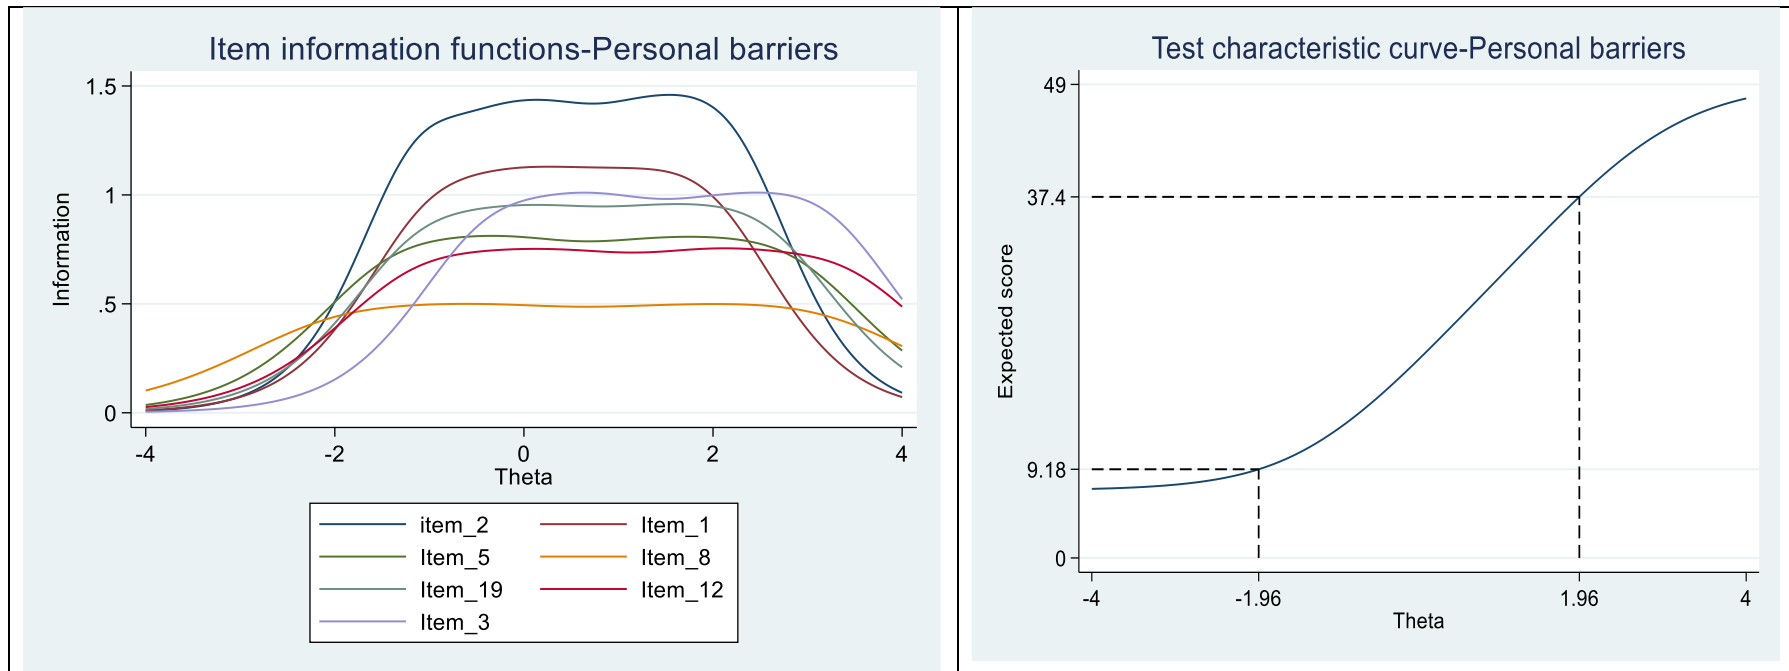

Figure SB. Item information functions (IIFs) and test characteristic curve (TCC) for Social norms (N=1027)

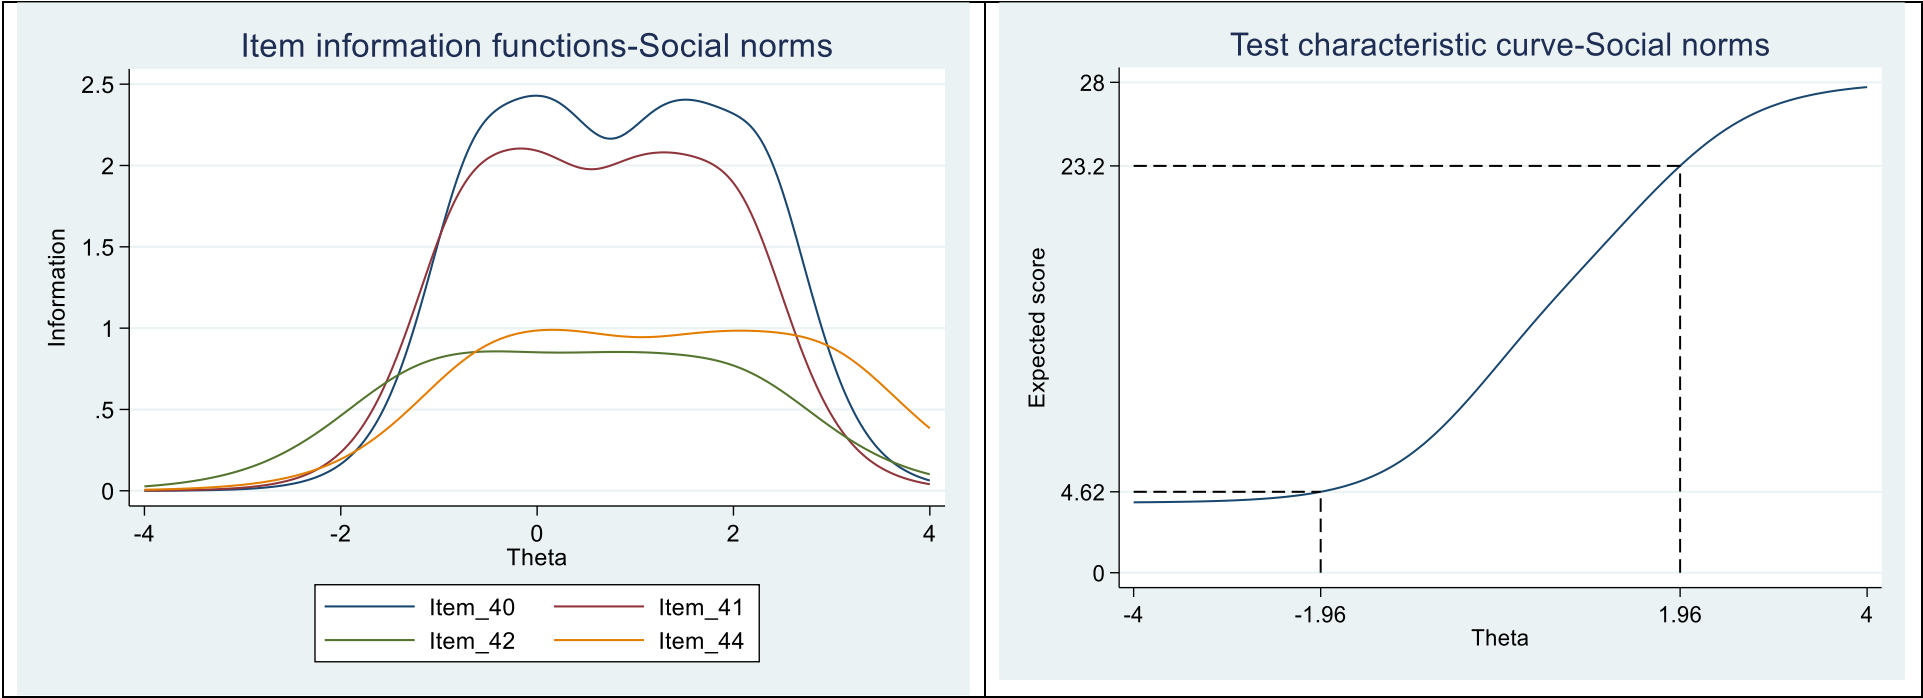

Figure SC. Item information functions (IIFs) and test characteristic curve (TCC) for **Confidence** (N=1027)

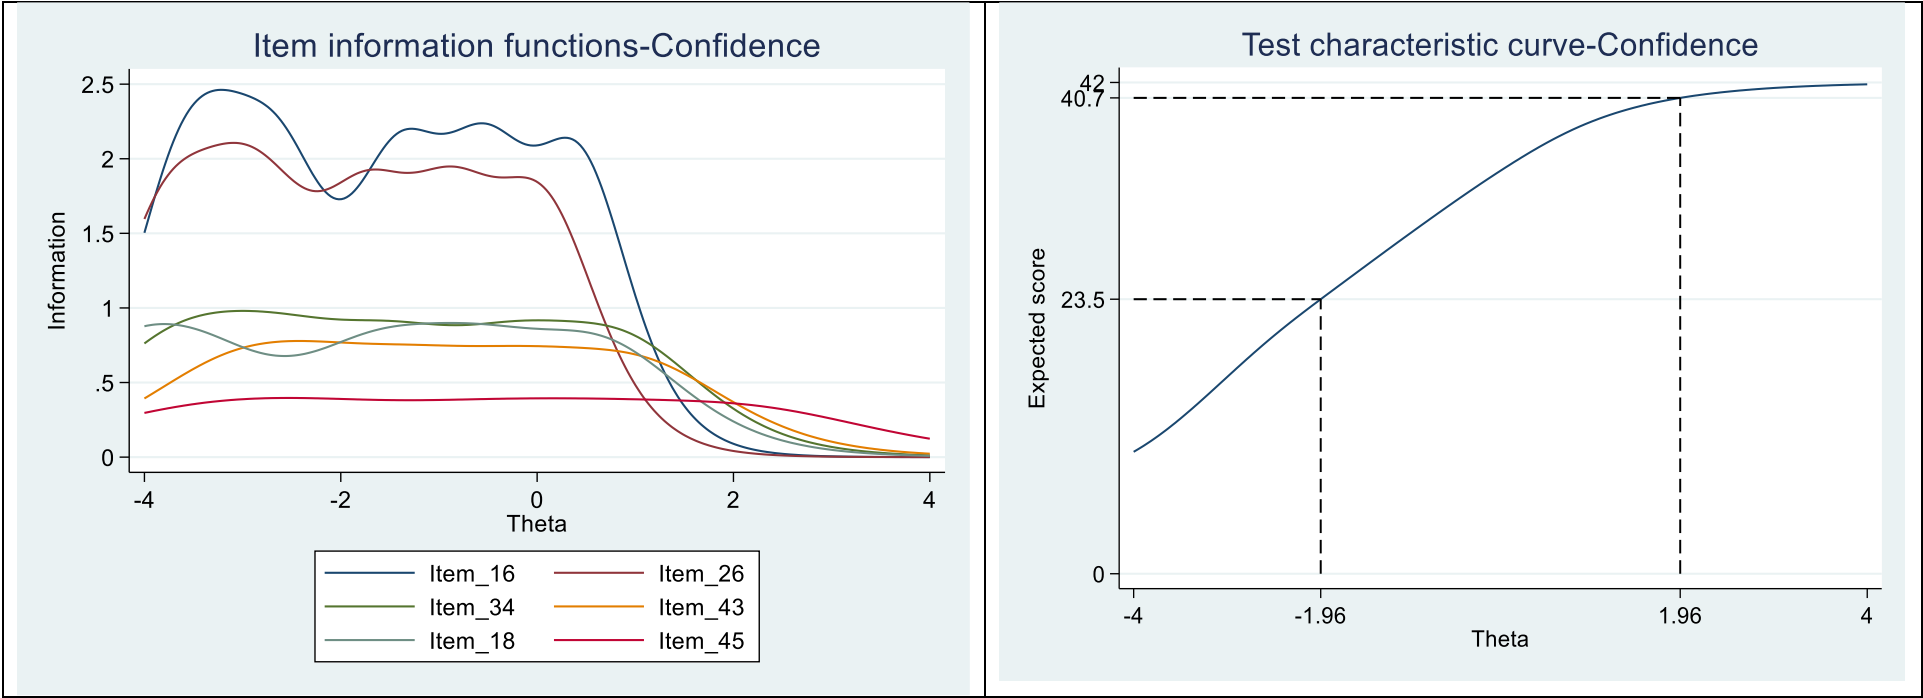

Figure SD. Item information functions (IIFs) and test characteristic curve (TCC) for **worries** (N=1027)

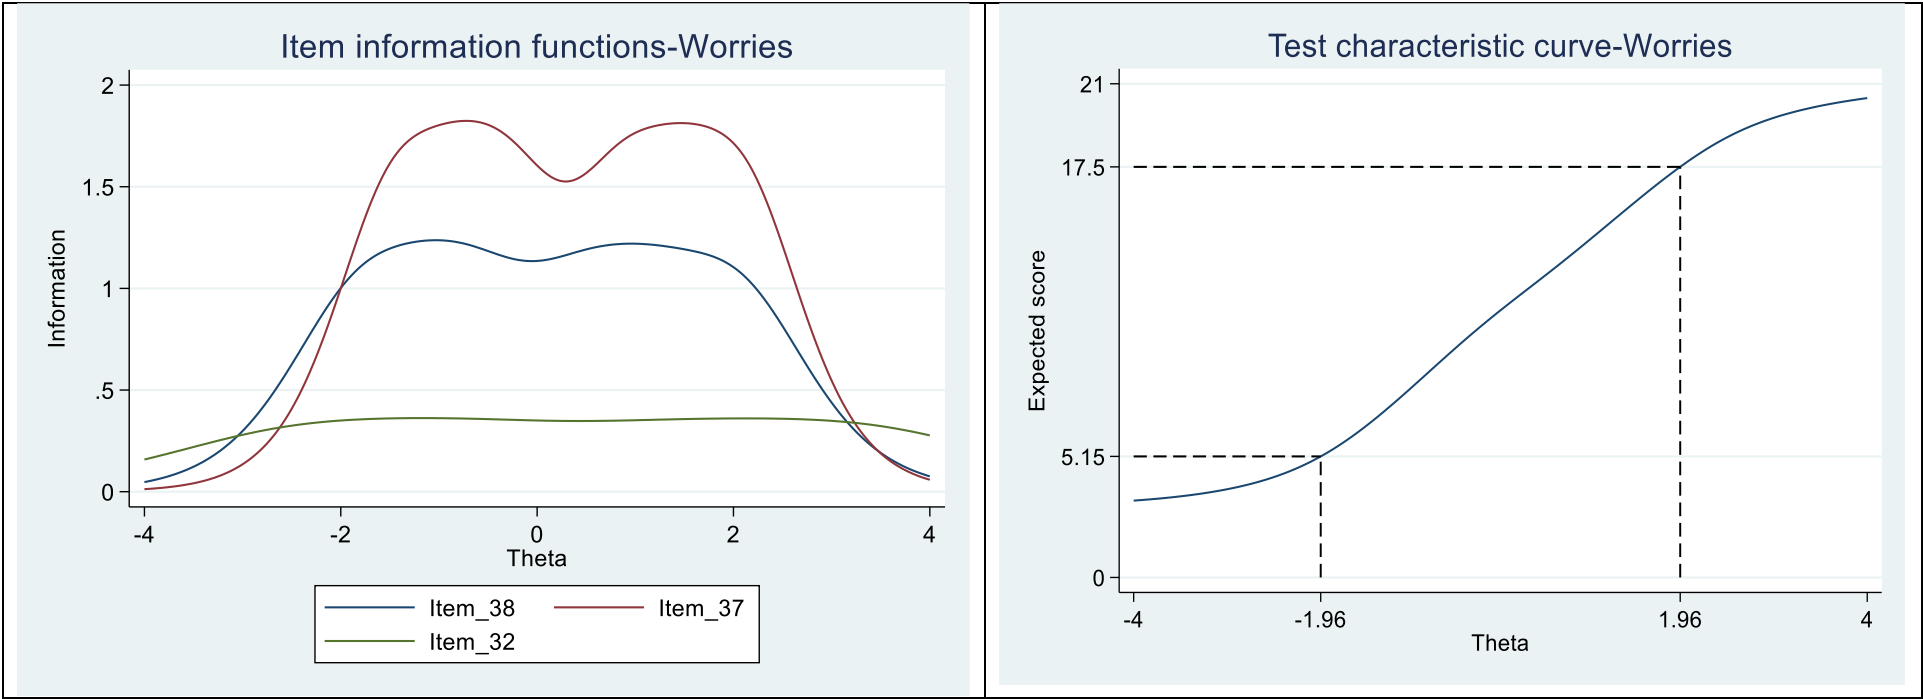

## HPV Self-Sampling Attitudes and Belief Scale

Figure SE. Item information functions (IIFs) and test characteristic curve (TCC) for **Concerns** (N=1027)

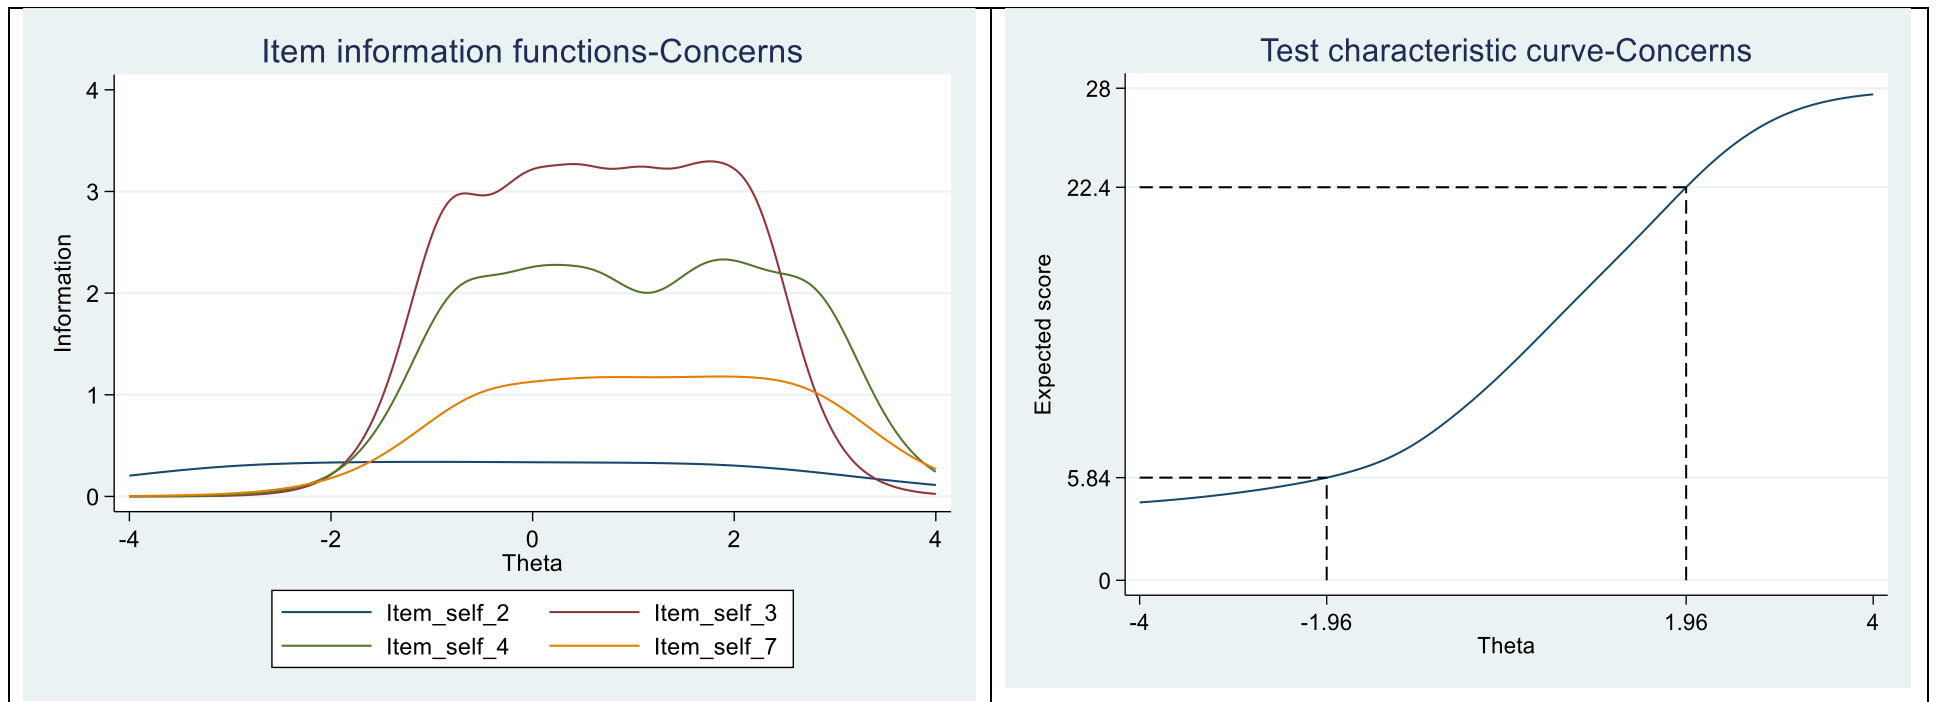

Figure SF. Item information functions (IIFs) and test characteristic curve (TCC) for **Autonomy** (N=1027)

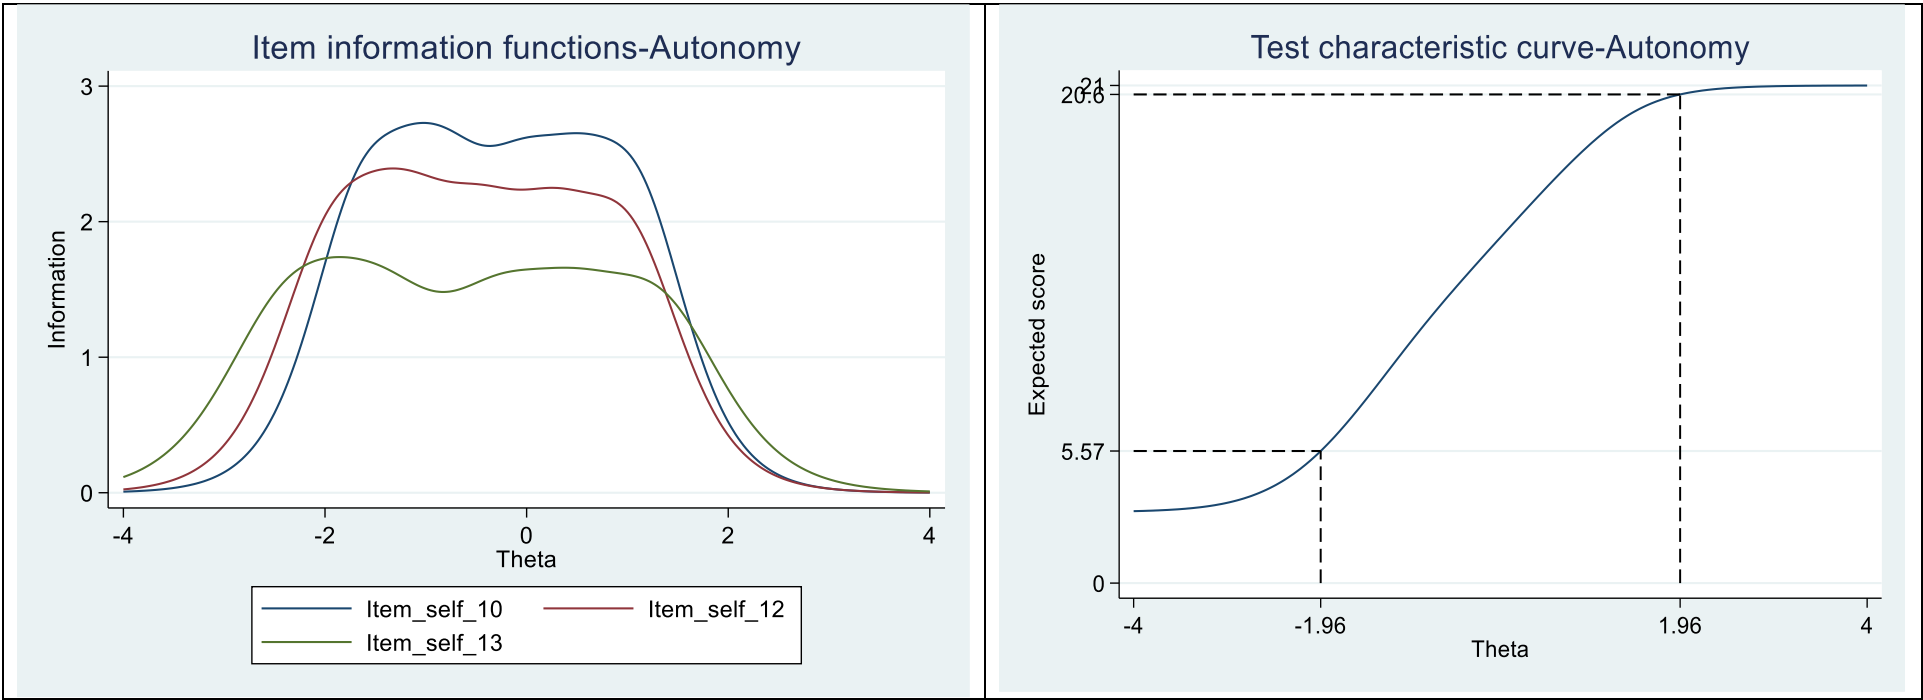

Figure SG. Test information functions (TIF) for items loading on factor 3 (18 items) and retained items (6 items) for the “Confidence” scale (n=512)

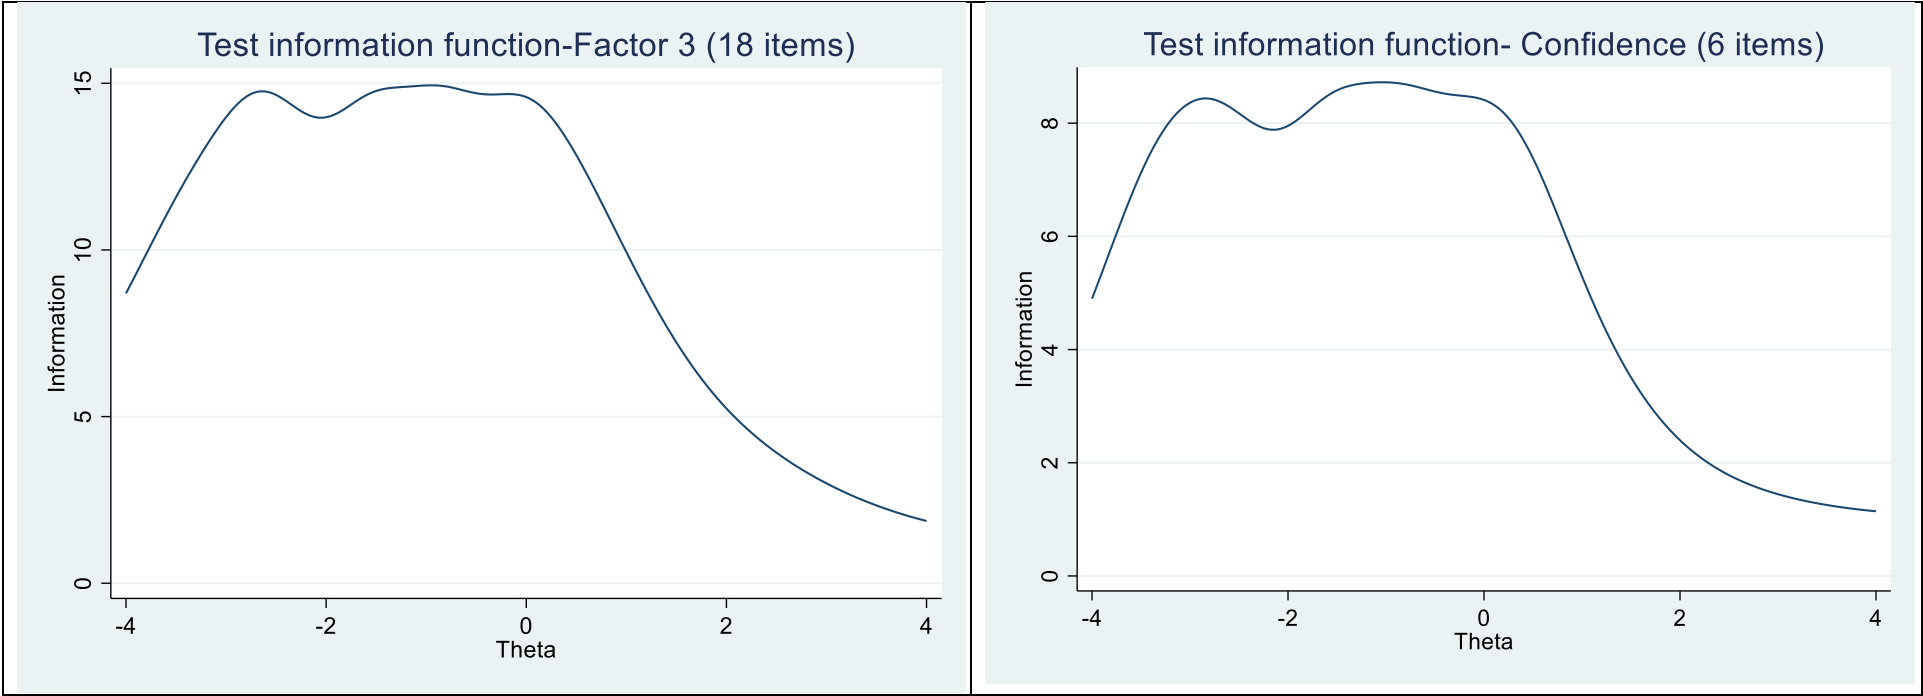

Supplement: s1 [file s1]
