# Supplementary material for: Understanding the Challenges of HPV-Based Cervical Screening: Development and Validation of HPV Testing and Self-Sampling Attitudes and Beliefs Scales
Source: MDPI journal article supplement (doi:10.3390/curroncol30010093), 2023-01-15
Supplement: s1 [file s1]

# **Supplementary Material File S3.**

Exploratory Factor Analyses

**Table SA.** Parallel analysis HPV test attitudes and beliefs items

| <b>Factor</b> | <b>Eigenvalues from dataset n=512</b> | <b>Randomly generated Eigenvalues</b> |
|---------------|---------------------------------------|---------------------------------------|
| 1             | <b>7.939</b>                          | 1.674                                 |
| 2             | <b>5.185</b>                          | 1.594                                 |
| 3             | <b>2.170</b>                          | 1.540                                 |
| 4             | <b>1.795</b>                          | 1.491                                 |
| 5             | <b>1.578</b>                          | 1.453                                 |
| 6             | 1.393                                 | 1.413                                 |
| 7             | 1.322                                 | 1.377                                 |
| 8             | 1.244                                 | 1.347                                 |
| 9             | 1.155                                 | 1.317                                 |
| 10            | 1.050                                 | 1.287                                 |
| 11            | 1.034                                 | 1.261                                 |

Obs: To randomly generate 95 percentile Eigenvalues in parallel analysis we used following specifications: 500 datasets; 512 cases; 44 variables; and principal component analysis. In boldface are Eigenvalues from the dataset that are higher than randomly generated Eigenvalues using parallel analysis suggesting a maximum 5-factor solution.

**Table SB.** Exploratory Factor Analysis (EFA) for HPV test attitudes and beliefs (44 items) (n=512)

| <b>Statement</b>                                                                                         | <b>F1</b>   | <b>F2</b>   | <b>F3</b> | <b>F4</b> |
|----------------------------------------------------------------------------------------------------------|-------------|-------------|-----------|-----------|
| I feel that ...                                                                                          |             |             |           |           |
| 1. ... I would be embarrassed to show my genitals to a healthcare professional during the HPV test       | <b>.686</b> | -.019       | -.018     | -.023     |
| 5. ... I have other priorities more important than having the HPV test                                   | <b>.638</b> | -.079       | -.135     | -.090     |
| 7. ... I would be uncomfortable with a male health care professional doing my HPV test                   | <b>.581</b> | -.081       | .044      | -.095     |
| 8. ... the HPV test would be painful                                                                     | <b>.573</b> | -.007       | .043      | .032      |
| 19. ... I would be embarrassed to get tested for HPV because it is a sexually transmitted infection      | <b>.564</b> | .198        | -.025     | .074      |
| 12. ... I would not need to have the HPV test because I do not have symptoms                             | <b>.549</b> | .113        | -.134     | -.096     |
| 2. ... going to see a healthcare professional to have the HPV test would take too much time              | <b>.536</b> | .028        | -.169     | .100      |
| 11. ... I would not need to have the HPV test because I only have one sexual partner                     | <b>.498</b> | .072        | -.097     | -.046     |
| 3. ... healthcare professionals doing the HPV test would be rude to me                                   | <b>.451</b> | .188        | -.263     | .120      |
| 20. ... if the HPV test showed I have HPV, I would be ashamed                                            | <b>.418</b> | .171        | -.019     | .180      |
| 33. ... I do not have enough information to make a decision about getting screened with the HPV test     | <b>.417</b> | .122        | .075      | -.002     |
| 4. ... that I would not remember to have the HPV test regularly                                          | <b>.413</b> | -.051       | .072      | .052      |
| 21. ... I would not trust the HPV test as much as the Pap test for my routine cervical cancer screening* | <b>.365</b> | .015        | -.226     | .166      |
| 24. ... if the HPV test showed I have HPV, I would suspect my partner of being unfaithful                | <b>.227</b> | .116        | .035      | .123      |
| 41. ... my family's opinion about getting the HPV test would be important to me                          | .101        | <b>.687</b> | -.020     | -.067     |

|                                                                                                                                                 |       |             |              |             |
|-------------------------------------------------------------------------------------------------------------------------------------------------|-------|-------------|--------------|-------------|
| 40. ... my friends' opinion about getting the HPV test would be important to me                                                                 | .122  | <b>.686</b> | -.077        | -.097       |
| 44. ... opinions I see on social media (for example, on Facebook, Twitter, Instagram, etc.) about getting the HPV test would be important to me | -.040 | <b>.685</b> | -.146        | .056        |
| 42. ... my partner's opinion about getting the HPV test would be important to me                                                                | .143  | <b>.581</b> | .104         | -.051       |
| 22. ... if the HPV test showed I have HPV, I would be worried about my ability to have children                                                 | .042  | <b>.409</b> | -.008        | .204        |
| 6. ... if the HPV test showed I have HPV, it would mean I have cancer*                                                                          | .233  | <b>.306</b> | -.031        | .125        |
| 9. ... I would need the HPV test because I am at risk of developing cervical cancer*                                                            | -.157 | <b>.275</b> | .111         | .274        |
| 10. ... having the HPV test would prevent me from getting cervical cancer*                                                                      | -.132 | <b>.206</b> | .147         | .047        |
| 26. ... if the HPV test showed I have HPV, it is important to follow up on it                                                                   | -.065 | -.179       | <b>.758</b>  | .005        |
| 34. ... if I learn that I have an HPV infection, I feel that I would need more information to help me deal with the results                     | .077  | -.059       | <b>.701</b>  | .081        |
| 16. ... having the HPV test would be a good way to identify problems before they become cancer                                                  | -.199 | -.073       | <b>.675</b>  | .055        |
| 17. ... the HPV test would be a good way to detect early abnormal changes in the cervix                                                         | -.128 | -.026       | <b>.580</b>  | .041        |
| 18. ... the HPV test would be safe                                                                                                              | -.253 | -.088       | <b>.554</b>  | .023        |
| 43. ... my healthcare professional's opinion about getting the HPV test would be important to me                                                | -.134 | .181        | <b>.538</b>  | .031        |
| 35. ... it would be important to get a reminder to go for my cervical cancer screening (for example, with a mailed reminder letter)             | -.139 | .011        | <b>.483</b>  | .254        |
| 30. ... getting more information about the HPV test would reduce my fear about this test                                                        | .073  | .230        | <b>.482</b>  | .040        |
| 14. ... having the HPV test would be entirely up to me                                                                                          | .154  | -.118       | <b>.475</b>  | -.102       |
| 31. ... getting more information about the HPV test may reduce my fear about increasing time between screenings to more than 3 years            | -.017 | .224        | <b>.466</b>  | .057        |
| 39. ... if the HPV test showed I have HPV, it would be serious                                                                                  | .110  | .157        | <b>.442</b>  | .043        |
| 15. ... I do not want to have the HPV test because it would affect my sex life*                                                                 | .276  | .364        | <b>-.422</b> | .139        |
| 45. ... public health agencies' opinions about getting the HPV test would be important to me                                                    | -.088 | .232        | <b>.387</b>  | .079        |
| 36. ... if the HPV test showed I have HPV, I would be comfortable sharing this information with my partner                                      | -.070 | -.099       | <b>.360</b>  | -.034       |
| 25. ... if the HPV test showed I have HPV, I would not really be worried                                                                        | .071  | .064        | <b>-.358</b> | .053        |
| 13. ... it would be simple for me to have access to a healthcare professional to receive the HPV test                                           | -.137 | .050        | <b>.341</b>  | -.032       |
| 23. ... if the HPV test showed I have HPV, I would worry about giving my partner HPV*                                                           | .035  | .041        | <b>.261</b>  | .195        |
| 27. ... if the HPV test showed I have HPV, this result should not be delivered over the phone*                                                  | .111  | .138        | <b>.182</b>  | .024        |
| 37. ... I would be worried about starting screening for cervical cancer with the HPV test at 25 years old instead of 21 years old               | .032  | -.086       | -.096        | <b>.792</b> |
| 38. ... I would be worried about starting screening for cervical cancer with the HPV test at 30 years old instead of 21 years old               | .034  | -.137       | -.036        | <b>.743</b> |

|                                                                                                                                  |       |       |       |             |
|----------------------------------------------------------------------------------------------------------------------------------|-------|-------|-------|-------------|
| 32. ... I would be worried about getting tested with the HPV test less often than every 3 years                                  | -.029 | .163  | -.008 | <b>.428</b> |
| 29. ... if the government increases the time between screenings to more than 3 years, this would be done solely to reduce costs* | .041  | -.046 | .179  | <b>.239</b> |

Note: Item 28 was not included in EFA because it was an attention check item. In the columns are displayed factor loadings (F1-F4) from EFA. We used maximum likelihood extraction with oblimin rotation for a 4-factor solution on the first random sample n= 512 observations.\* denotes items for which factor cross loadings is > 0.6.

**Table SC.** Parallel analysis HPV self-sampling items

| Factor | Eigenvalues from dataset n=512 | Randomly generated Eigenvalues |
|--------|--------------------------------|--------------------------------|
| 1      | <b>4.091</b>                   | 1.334                          |
| 2      | <b>2.700</b>                   | 1.251                          |
| 3      | 1.062                          | 1.192                          |

Obs: To randomly generate 95 percentile Eigenvalues in parallel analysis we used following specifications: 500 datasets; 512 cases; 13 variables; and principal components. In boldface are Eigenvalues from the dataset that are higher than randomly generated Eigenvalues using parallel analysis suggesting a maximum 2-factor solution.

**Table SD.** Exploratory Factor Analysis (EFA) for HPV self-sampling (13 items) on the first sample (n=512)

| Statement                                                                                                                                      | F1           | F2          |
|------------------------------------------------------------------------------------------------------------------------------------------------|--------------|-------------|
| I feel that ...                                                                                                                                |              |             |
| 3. ... if I did HPV self-sampling, I could harm myself                                                                                         | <b>.796</b>  | -.015       |
| 4. ... if I did HPV self-sampling, I could get an infection                                                                                    | <b>.793</b>  | .149        |
| 7. ... I would feel embarrassed doing HPV self-sampling                                                                                        | <b>.710</b>  | .057        |
| 6. ... if I did HPV self-sampling, I would miss my regular gynecological exam                                                                  | <b>.542</b>  | .255        |
| 9. ... HPV self-sampling would be easy to do*                                                                                                  | <b>-.531</b> | .370        |
| 2. ... if I did HPV self-sampling, I would worry that I am not doing it right                                                                  | <b>.503</b>  | -.264       |
| 14. ... if I did HPV self-sampling, I would be concerned about being followed-up properly                                                      | <b>.502</b>  | -.083       |
| 5. ... HPV self-sampling is just a way for the government to save money                                                                        | <b>.373</b>  | -.035       |
| 10. ... I would be more comfortable doing the swab by myself using HPV self-sampling than having an HPV test done by a healthcare professional | -.145        | <b>.825</b> |
| 12. ... I would prefer doing HPV self-sampling at home because it would save me travelling to see a healthcare professional                    | -.283        | <b>.701</b> |
| 13. ... if I did HPV self-sampling, I would be more in control of my body                                                                      | -.175        | <b>.636</b> |
| 1. ... I would prefer doing HPV self-sampling because it would avoid my family knowing that I am being screened for cervical cancer            | .282         | <b>.568</b> |
| 8. ... I would be willing to pay to do HPV self-sampling over getting the HPV test for free at the doctor's office                             | .141         | <b>.528</b> |

Note: Item 11 was not included in EFA because it was an attention check item. In columns are displayed factor loadings EFA from using maximum likelihood extraction with oblimin rotation for a 2-factor solution on the first random sample n= 512 observations. \* denotes items for which factor cross loadings is > 0.6.
