# Supplementary material for: Understanding the Challenges of HPV-Based Cervical Screening: Development and Validation of HPV Testing and Self-Sampling Attitudes and Beliefs Scales
Source: MDPI journal article supplement (doi:10.3390/curroncol30010093), 2023-01-15
Supplement: s1 [file s1]

# **Supplementary Material File S1.**

All Included Items

## Attitudes and Beliefs about HPV Testing

The following sections will present a series of statements about HPV testing. Please note that we are not asking about your knowledge. Whether or not you have had an HPV test in the past, we wish to know about your attitudes and beliefs. If you are unsure how to answer any question, simply select the answer that best reflects your attitudes and beliefs.

| Statement                                                                                          | Strongly disagree<br>(1) | Disagree<br>(2) | Somewhat disagree<br>(3) | Neutral<br>(4) | Somewhat agree<br>(5) | Agree<br>(6) | Strongly agree<br>(7) |
|----------------------------------------------------------------------------------------------------|--------------------------|-----------------|--------------------------|----------------|-----------------------|--------------|-----------------------|
| I feel that ...                                                                                    |                          |                 |                          |                |                       |              |                       |
| 1. ... I would be embarrassed to show my genitals to a healthcare professional during the HPV test |                          |                 |                          |                |                       |              |                       |
| 2. ... going to see a healthcare professional to have the HPV test would take too much time        |                          |                 |                          |                |                       |              |                       |
| 3. ... healthcare professionals doing the HPV test would be rude to me                             |                          |                 |                          |                |                       |              |                       |
| 4. ... that I would not remember to have the HPV test regularly                                    |                          |                 |                          |                |                       |              |                       |
| 5. ... I have other priorities more important than having the HPV test                             |                          |                 |                          |                |                       |              |                       |
| 6. ... if the HPV test showed I have HPV, it would mean I have cancer                              |                          |                 |                          |                |                       |              |                       |
| 7. ... I would be uncomfortable with a male health care professional doing my HPV test             |                          |                 |                          |                |                       |              |                       |
| 8. ... the HPV test would be painful                                                               |                          |                 |                          |                |                       |              |                       |

| Statement                                                                                             | Strongly disagree<br>(1) | Disagree<br>(2) | Somewhat disagree<br>(3) | Neutral<br>(4) | Somewhat agree<br>(5) | Agree<br>(6) | Strongly agree<br>(7) |
|-------------------------------------------------------------------------------------------------------|--------------------------|-----------------|--------------------------|----------------|-----------------------|--------------|-----------------------|
| I feel that ...                                                                                       |                          |                 |                          |                |                       |              |                       |
| 9. ... I would need the HPV test because I am at risk of developing cervical cancer                   |                          |                 |                          |                |                       |              |                       |
| 10. ... having the HPV test would prevent me from getting cervical cancer                             |                          |                 |                          |                |                       |              |                       |
| 11. ... I would not need to have the HPV test because I only have one sexual partner                  |                          |                 |                          |                |                       |              |                       |
| 12. ... I would not need to have the HPV test because I do not have symptoms                          |                          |                 |                          |                |                       |              |                       |
| 13. ... it would be simple for me to have access to a healthcare professional to receive the HPV test |                          |                 |                          |                |                       |              |                       |
| 14. ... having the HPV test would be entirely up to me                                                |                          |                 |                          |                |                       |              |                       |
| 15. ... I do not want to have the HPV test because it would affect my sex life                        |                          |                 |                          |                |                       |              |                       |
| 16. ... having the HPV test would be a good way to identify problems before they become cancer        |                          |                 |                          |                |                       |              |                       |
| 17. ... the HPV test would be a good way to detect early abnormal changes in the cervix               |                          |                 |                          |                |                       |              |                       |
| 18. ... the HPV test would be safe                                                                    |                          |                 |                          |                |                       |              |                       |

| Statement                                                                                               | Strongly disagree<br>(1) | Disagree<br>(2) | Somewhat disagree<br>(3) | Neutral<br>(4) | Somewhat agree<br>(5) | Agree<br>(6) | Strongly agree<br>(7) |
|---------------------------------------------------------------------------------------------------------|--------------------------|-----------------|--------------------------|----------------|-----------------------|--------------|-----------------------|
| I feel that ...                                                                                         |                          |                 |                          |                |                       |              |                       |
| 19. ... I would be embarrassed to get tested for HPV because it is a sexually transmitted infection     |                          |                 |                          |                |                       |              |                       |
| 20. ... if the HPV test showed I have HPV, I would be ashamed                                           |                          |                 |                          |                |                       |              |                       |
| 21. ... I would not trust the HPV test as much as the Pap test for my routine cervical cancer screening |                          |                 |                          |                |                       |              |                       |
| 22. ... if the HPV test showed I have HPV, I would be worried about my ability to have children         |                          |                 |                          |                |                       |              |                       |
| 23. ... if the HPV test showed I have HPV, I would worry about giving my partner HPV                    |                          |                 |                          |                |                       |              |                       |
| 24. ... if the HPV test showed I have HPV, I would suspect my partner of being unfaithful               |                          |                 |                          |                |                       |              |                       |
| 25. ... if the HPV test showed I have HPV, I would not really be worried                                |                          |                 |                          |                |                       |              |                       |
| 26. ... if the HPV test showed I have HPV, it is important to follow up on it                           |                          |                 |                          |                |                       |              |                       |
| 27. ... if the HPV test showed I have HPV, this result should not be delivered over the phone           |                          |                 |                          |                |                       |              |                       |

| Statement                                                                                                                                        | Strongly disagree<br>(1) | Disagree<br>(2) | Somewhat disagree<br>(3) | Neutral<br>(4) | Somewhat agree<br>(5) | Agree<br>(6) | Strongly agree<br>(7) |
|--------------------------------------------------------------------------------------------------------------------------------------------------|--------------------------|-----------------|--------------------------|----------------|-----------------------|--------------|-----------------------|
| I feel that ...                                                                                                                                  |                          |                 |                          |                |                       |              |                       |
| 28. ... to show us that you are reading the questions carefully, please select “strongly agree”, for this question only. [ATTENTION CHECK ITEM]* |                          |                 |                          |                |                       |              |                       |
| 29. ... if the government increases the time between screenings to more than 3 years, this would be done solely to reduce costs                  |                          |                 |                          |                |                       |              |                       |
| 30. ... getting more information about the HPV test would reduce my fear about this test                                                         |                          |                 |                          |                |                       |              |                       |
| 31. ... getting more information about the HPV test may reduce my fear about increasing time between screenings to more than 3 years             |                          |                 |                          |                |                       |              |                       |
| 32. ... I would be worried about getting tested with the HPV test less often than every 3 years                                                  |                          |                 |                          |                |                       |              |                       |
| 33. ... I do not have enough information to make a decision about getting screened with the HPV test                                             |                          |                 |                          |                |                       |              |                       |
| 34. ... if I learn that I have an HPV infection, I feel that I would need more information to help me deal with the results                      |                          |                 |                          |                |                       |              |                       |

| Statement                                                                                                                           | Strongly disagree<br>(1) | Disagree<br>(2) | Somewhat disagree<br>(3) | Neutral<br>(4) | Somewhat agree<br>(5) | Agree<br>(6) | Strongly agree<br>(7) |
|-------------------------------------------------------------------------------------------------------------------------------------|--------------------------|-----------------|--------------------------|----------------|-----------------------|--------------|-----------------------|
| I feel that ...                                                                                                                     |                          |                 |                          |                |                       |              |                       |
| 35. ... it would be important to get a reminder to go for my cervical cancer screening (for example, with a mailed reminder letter) |                          |                 |                          |                |                       |              |                       |
| 36. ... if the HPV test showed I have HPV, I would be comfortable sharing this information with my partner                          |                          |                 |                          |                |                       |              |                       |
| 37. ... I would be worried about starting screening for cervical cancer with the HPV test at 25 years old instead of 21 years old   |                          |                 |                          |                |                       |              |                       |
| 38. ... I would be worried about starting screening for cervical cancer with the HPV test at 30 years old instead of 21 years old   |                          |                 |                          |                |                       |              |                       |
| 39. ... if the HPV test showed I have HPV, it would be serious                                                                      |                          |                 |                          |                |                       |              |                       |
| 40. ... my friends' opinion about getting the HPV test would be important to me                                                     |                          |                 |                          |                |                       |              |                       |
| 41. ... my family's opinion about getting the HPV test would be important to me                                                     |                          |                 |                          |                |                       |              |                       |
| 42. ... my partner's opinion about getting the HPV test would be important to me                                                    |                          |                 |                          |                |                       |              |                       |
| 43. ... my healthcare professional's opinion about getting the HPV test would be important to me                                    |                          |                 |                          |                |                       |              |                       |

| Statement                                                                                                                                       | Strongly disagree<br>(1) | Disagree<br>(2) | Somewhat disagree<br>(3) | Neutral<br>(4) | Somewhat agree<br>(5) | Agree<br>(6) | Strongly agree<br>(7) |
|-------------------------------------------------------------------------------------------------------------------------------------------------|--------------------------|-----------------|--------------------------|----------------|-----------------------|--------------|-----------------------|
| I feel that ...                                                                                                                                 |                          |                 |                          |                |                       |              |                       |
| 44. ... opinions I see on social media (for example, on Facebook, Twitter, Instagram, etc.) about getting the HPV test would be important to me |                          |                 |                          |                |                       |              |                       |
| 45. ... public health agencies' opinions about getting the HPV test would be important to me                                                    |                          |                 |                          |                |                       |              |                       |

Note: \* denotes attention check items used for data cleaning that were not retained in CFA and EFA analyses

## Attitudes and Beliefs about HPV Self-sampling

The following sections will present a series of statements about HPV self-sampling. Please note that we are not asking about your knowledge. Whether or not you have done HPV self-sampling in the past, we wish to know your attitudes and beliefs. If you are unsure how to answer any question, simply select the answer that best reflects your attitudes and beliefs.

| Statement                                                                                                                           | Strongly disagree<br>(1) | Disagree<br>(2) | Somewhat disagree<br>(3) | Neutral<br>(4) | Somewhat agree<br>(5) | Agree<br>(6) | Strongly agree<br>(7) |
|-------------------------------------------------------------------------------------------------------------------------------------|--------------------------|-----------------|--------------------------|----------------|-----------------------|--------------|-----------------------|
| I feel that ...                                                                                                                     |                          |                 |                          |                |                       |              |                       |
| 1. ... I would prefer doing HPV self-sampling because it would avoid my family knowing that I am being screened for cervical cancer |                          |                 |                          |                |                       |              |                       |
| 2. ... if I did HPV self-sampling, I would worry that I am not doing it right                                                       |                          |                 |                          |                |                       |              |                       |
| 3. ... if I did HPV self-sampling, I could harm myself                                                                              |                          |                 |                          |                |                       |              |                       |
| 4. ... if I did HPV self-sampling, I could get an infection                                                                         |                          |                 |                          |                |                       |              |                       |
| 5. ... HPV self-sampling is just a way for the government to save money                                                             |                          |                 |                          |                |                       |              |                       |
| 6. ... if I did HPV self-sampling, I would miss my regular gynecological exam                                                       |                          |                 |                          |                |                       |              |                       |
| 7. ... I would feel embarrassed doing HPV self-sampling                                                                             |                          |                 |                          |                |                       |              |                       |
| 8. ... I would be willing to pay to do HPV self-sampling over getting the HPV test for free at the doctor's office                  |                          |                 |                          |                |                       |              |                       |



| Statement                                                                                                                                         | Strongly disagree<br>(1) | Disagree<br>(2) | Somewhat disagree<br>(3) | Neutral<br>(4) | Somewhat agree<br>(5) | Agree<br>(6) | Strongly agree<br>(7) |
|---------------------------------------------------------------------------------------------------------------------------------------------------|--------------------------|-----------------|--------------------------|----------------|-----------------------|--------------|-----------------------|
| I feel that ...                                                                                                                                   |                          |                 |                          |                |                       |              |                       |
| 9. ... HPV self-sampling would be easy to do                                                                                                      |                          |                 |                          |                |                       |              |                       |
| 10. ... I would be more comfortable doing the swab by myself using HPV self-sampling than having an HPV test done by a healthcare professional    |                          |                 |                          |                |                       |              |                       |
| 11. ... to show us that you're reading the questions carefully, please select "somewhat disagree", for this question only [ATTENTION CHECK ITEM]* |                          |                 |                          |                |                       |              |                       |
| 12. ... I would prefer doing HPV self-sampling at home because it would save me travelling to see a healthcare professional                       |                          |                 |                          |                |                       |              |                       |
| 13. ... if I did HPV self-sampling, I would be more in control of my body                                                                         |                          |                 |                          |                |                       |              |                       |
| 14. ... if I did HPV self-sampling, I would be concerned about being followed-up properly                                                         |                          |                 |                          |                |                       |              |                       |

Note: \* denotes attention check items used for data cleaning that were not retained in CFA and EFA analyses
