# Supplementary material for: Understanding the Challenges of HPV-Based Cervical Screening: Development and Validation of HPV Testing and Self-Sampling Attitudes and Beliefs Scales
Source: MDPI journal article supplement (doi:10.3390/curroncol30010093), 2023-01-15
Supplement: s1 [file s1]

# **Supplementary Material File S4.**

Item Response Theory Analyses

**Table SA.** EFA factor loadings and results of IRT for the HPV test attitudes and beliefs items (n=44), first sample (n=512)

| Statement                                                                                                                                       | EFA<br>(n=512) | Discrimination<br>(n=512) | Information<br>(n=512) |
|-------------------------------------------------------------------------------------------------------------------------------------------------|----------------|---------------------------|------------------------|
| I feel that ...                                                                                                                                 |                |                           |                        |
| <b>Factor 1</b>                                                                                                                                 |                |                           |                        |
| 1. ... I would be embarrassed to show my genitals to a healthcare professional during the HPV test                                              | .686           | 2.01                      | 1.28                   |
| 5. ... I have other priorities more important than having the HPV test                                                                          | .638           | 1.62                      | 0.83                   |
| 7. ... I would be uncomfortable with a male health care professional doing my HPV test                                                          | .581           | 1.22                      | 0.48                   |
| 8. ... the HPV test would be painful                                                                                                            | .573           | 1.30                      | 0.53                   |
| 19. ... I would be embarrassed to get tested for HPV because it is a sexually transmitted infection                                             | .564           | 1.93                      | 1.18                   |
| 12. ... I would not need to have the HPV test because I do not have symptoms                                                                    | .549           | 1.61                      | 0.82                   |
| 2. ... going to see a healthcare professional to have the HPV test would take too much time                                                     | .536           | 1.84                      | 1.08                   |
| 11. ... I would not need to have the HPV test because I only have one sexual partner                                                            | .498           | 1.43                      | 0.64                   |
| 3. ... healthcare professionals doing the HPV test would be rude to me                                                                          | .451           | 1.82                      | 1.05                   |
| 20. ... if the HPV test showed I have HPV, I would be ashamed                                                                                   | .418           | 1.29                      | 0.53                   |
| 33. ... I do not have enough information to make a decision about getting screened with the HPV test                                            | .417           | 0.90                      | 0.26                   |
| 4. ... that I would not remember to have the HPV test regularly                                                                                 | .413           | 0.79                      | 0.20                   |
| 21. ... I would not trust the HPV test as much as the Pap test for my routine cervical cancer screening                                         | .365           | 1.11                      | 0.38                   |
| 24. ... if the HPV test showed I have HPV, I would suspect my partner of being unfaithful                                                       | .227           | 0.59                      | 0.10                   |
| <b>Factor 2</b>                                                                                                                                 |                |                           |                        |
| 41. ... my family's opinion about getting the HPV test would be important to me                                                                 | .687           | 2.37                      | 1.78                   |
| 40. ... my friends' opinion about getting the HPV test would be important to me                                                                 | .686           | 2.24                      | 1.59                   |
| 44. ... opinions I see on social media (for example, on Facebook, Twitter, Instagram, etc.) about getting the HPV test would be important to me | .685           | 2.05                      | 1.33                   |
| 42. ... my partner's opinion about getting the HPV test would be important to me                                                                | .581           | 1.70                      | 0.92                   |
| 22. ... if the HPV test showed I have HPV, I would be worried about my ability to have children                                                 | .409           | 1.07                      | 0.36                   |
| 6. ... if the HPV test showed I have HPV, it would mean I have cancer                                                                           | .306           | 0.81                      | 0.21                   |
| 9. ... I would need the HPV test because I am at risk of developing cervical cancer                                                             | .275           | 0.52                      | 0.09                   |
| 10. ... having the HPV test would prevent me from getting cervical cancer                                                                       | .206           | 0.24                      | 0.02                   |
| <b>Factor 3</b>                                                                                                                                 |                |                           |                        |
| 26. ... if the HPV test showed I have HPV, it is important to follow up on it                                                                   | .758           | 3.25                      | 2.98                   |
| 34. ... if I learn that I have an HPV infection, I feel that I would need more information to help me deal with the results                     | .701           | 1.99                      | 1.25                   |

|                                                                                                                                      |       |       |      |
|--------------------------------------------------------------------------------------------------------------------------------------|-------|-------|------|
| 16. ... having the HPV test would be a good way to identify problems before they become cancer                                       | .675  | 2.71  | 2.10 |
| 17. ... the HPV test would be a good way to detect early abnormal changes in the cervix                                              | .580  | 1.96  | 1.19 |
| 18. ... the HPV test would be safe                                                                                                   | .554  | 1.92  | 1.10 |
| 43. ... my healthcare professional's opinion about getting the HPV test would be important to me                                     | .538  | 1.71  | 0.93 |
| 35. ... it would be important to get a reminder to go for my cervical cancer screening (for example, with a mailed reminder letter)  | .483  | 1.72  | 0.94 |
| 30. ... getting more information about the HPV test would reduce my fear about this test                                             | .482  | 1.10  | 0.38 |
| 14. ... having the HPV test would be entirely up to me                                                                               | .475  | 0.96  | 0.28 |
| 31. ... getting more information about the HPV test may reduce my fear about increasing time between screenings to more than 3 years | .466  | 1.17  | 0.43 |
| 39. ... if the HPV test showed I have HPV, it would be serious                                                                       | .442  | 0.97  | 0.29 |
| 15. ... I do not want to have the HPV test because it would affect my sex life                                                       | -.422 | -1.38 | 0.60 |
| 45. ... public health agencies' opinions about getting the HPV test would be important to me                                         | .387  | 1.24  | 0.48 |
| 36. ... if the HPV test showed I have HPV, I would be comfortable sharing this information with my partner                           | .360  | 1.07  | 0.36 |
| 25. ... if the HPV test showed I have HPV, I would not really be worried                                                             | -.358 | -0.99 | 0.32 |
| 13. ... it would be simple for me to have access to a healthcare professional to receive the HPV test                                | .341  | 1.14  | 0.42 |
| 23. ... if the HPV test showed I have HPV, I would worry about giving my partner HPV                                                 | .261  | 0.81  | 0.21 |
| 27. ... if the HPV test showed I have HPV, this result should not be delivered over the phone                                        | .182  | 0.25  | 0.02 |
| <b>Factor 4</b>                                                                                                                      |       |       |      |
| 37. ... I would be worried about starting screening for cervical cancer with the HPV test at 25 years old instead of 21 years old    | .792  | 3.26  | 3.28 |
| 38. ... I would be worried about starting screening for cervical cancer with the HPV test at 30 years old instead of 21 years old    | .743  | 2.12  | 1.40 |
| 32. ... I would be worried about getting tested with the HPV test less often than every 3 years                                      | .428  | 0.95  | 0.29 |
| 29. ... if the government increases the time between screenings to more than 3 years, this would be done solely to reduce costs      | .239  | 0.46  | 0.07 |

Note: Highlighted items were retained in the final scale based on results of IRT analyses. In the information column are provided maximum information values as per item information functions.

**Table SB.** EFA factor loadings and results of IRT for the HPV self-sampling attitudes and beliefs items (n=13), first sample (n=512)

| Statement                                                                                                                                      | EFA<br>(n=512) | Discrimination<br>(n=512) | Information<br>(n=512) |
|------------------------------------------------------------------------------------------------------------------------------------------------|----------------|---------------------------|------------------------|
| I feel that ...                                                                                                                                |                |                           |                        |
| <b>Factor 1</b>                                                                                                                                |                |                           |                        |
| 3. ... if I did HPV self-sampling, I could harm myself                                                                                         | .796           | 3.04                      | 2.80                   |
| 4. ... if I did HPV self-sampling, I could get an infection                                                                                    | .793           | 2.50                      | 1.91                   |
| 7. ... I would feel embarrassed doing HPV self-sampling                                                                                        | .710           | 2.16                      | 1.46                   |
| 6. ... if I did HPV self-sampling, I would miss my regular gynecological exam                                                                  | .542           | 1.24                      | 0.48                   |
| 9. ... HPV self-sampling would be easy to do                                                                                                   | -.531          | -1.57                     | 0.78                   |
| 2. ... if I did HPV self-sampling, I would worry that I am not doing it right                                                                  | .503           | 1.18                      | 0.45                   |
| 14. ... if I did HPV self-sampling, I would be concerned about being followed-up properly                                                      | .502           | 1.19                      | 0.45                   |
| 5. ... HPV self-sampling is just a way for the government to save money                                                                        | .373           | 0.88                      | 0.25                   |
| <b>Factor 2</b>                                                                                                                                |                |                           |                        |
| 10. ... I would be more comfortable doing the swab by myself using HPV self-sampling than having an HPV test done by a healthcare professional | .825           | 4.37                      | 5.80                   |
| 12. ... I would prefer doing HPV self-sampling at home because it would save me travelling to see a healthcare professional                    | .701           | 2.34                      | 1.72                   |
| 13. ... if I did HPV self-sampling, I would be more in control of my body                                                                      | .636           | 1.99                      | 1.25                   |
| 1. ... I would prefer doing HPV self-sampling because it would avoid my family knowing that I am being screened for cervical cancer            | .568           | 0.92                      | 0.27                   |
| 8. ... I would be willing to pay to do HPV self-sampling over getting the HPV test for free at the doctor's office                             | .528           | 0.97                      | 0.30                   |

Note: Highlighted items were retained in the final scale based on IRT analyses. In the information column are provided maximum information values as per item information functions.
